# Supplementary material
Source: publisher site journal article supplement (https://www.dovepress.com/article/supplementary_file/621469/Supplementary%20Material.docx)
Supplement: Supplementary file 1 [file Supplementary%20Material.docx]

**Supplementary Table 1.** Search Strategy (4 Databases)

|  | **PCC** | **English Synonyms (Free Text)** | **MeSH Terms (PubMed)** |
| --- | --- | --- | --- |
| **P** | Adult patients in intensive care units | (“intensive care unit” OR ICU OR “critical care” OR “critically ill” OR “critical illness”) AND (adult OR adults OR “adult patient*” OR “18 years” OR “aged 18 years”) | (“Intensive Care Units”[MeSH] OR “Critical Care”[MeSH] OR “Critical Illness”[MeSH]) AND (“Adult”[MeSH] OR “Aged”[MeSH] OR “Young Adult”[MeSH] OR “Middle Aged”[MeSH]) |
| **C** | Explainable AI or interpretable machine learning tools or models designed for clinical decision support. | (“artificial intelligence” OR AI OR “machine learning” OR “deep learning” OR algorithm* OR “predictive model*”) AND (“clinical decision support” OR “decision support” OR CDSS OR “decision-making” OR “risk stratification” OR alert* OR “early warning” OR recommendation* OR triage) AND (“explainable AI” OR XAI OR “explainable machine learning” OR “interpretable machine learning” OR interpretability OR interpretable OR explainability OR “model explanation*” OR “model interpretability” OR “post-hoc explanation*” OR SHAP OR Shapley OR LIME OR counterfactual* OR “feature attribution” OR “feature importance” OR saliency OR “saliency map*” OR attention OR “attention mechanism*” OR “Grad-CAM” OR “partial dependence” OR “partial dependence plot” OR PDP OR “individual conditional expectation” OR ICE) | (“Artificial Intelligence”[MeSH] OR “Machine Learning”[MeSH] OR “Deep Learning”[MeSH] OR “Algorithms”[MeSH]) AND “Decision Making, Computer-Assisted”[MeSH] |
| **C** | ICU clinical practice and workflow integration | (“clinical practice” OR “clinical workflow” OR workflow OR “workflow integration” OR implementation OR deployment OR “real-world” OR bedside OR “point of care” OR dashboard* OR alert* OR “electronic health record*” OR EHR OR “electronic medical record*” OR EMR OR “human-in-the-loop” OR usability OR “user evaluation” OR clinician* OR physician* OR nurse*) AND (“intensive care” OR ICU OR “critical care”) | (“Workflow”[MeSH] OR “Electronic Health Records”[MeSH] OR “Medical Records Systems, Computerized”[MeSH] OR “Point-of-Care Systems”[MeSH] OR “Diffusion of Innovation”[MeSH]) AND (“Intensive Care Units”[MeSH] OR “Critical Care”[MeSH]) |

| **Database** | **#** | **Search syntax** | **Citations found*** |
| --- | --- | --- | --- |
| PubMed | 1 | (“intensive care unit”[tiab] OR “intensive care”[tiab] OR ICU[tiab] OR “critical care”[tiab] OR “critically ill”[tiab] OR “critical illness”[tiab]) AND (adult[tiab] OR adults[tiab] OR “adult patient*”[tiab] OR “18 years”[tiab] OR “aged 18 years”[tiab]) | 233224 |
| PubMed | 2 | (“Intensive Care Units”[MeSH] OR “Critical Care”[MeSH] OR “Critical Illness”[MeSH]) AND (“Adult”[MeSH] OR “Aged”[MeSH] OR “Young Adult”[MeSH] OR “Middle Aged”[MeSH]) | 77007 |
| PubMed | 3 | (“artificial intelligence”[tiab] OR AI[tiab] OR “machine learning”[tiab] OR “deep learning”[tiab] OR algorithm*[tiab] OR “predictive model*”[tiab]) AND (“clinical decision support”[tiab] OR “decision support”[tiab] OR CDSS[tiab] OR “decision-making”[tiab] OR “risk stratification”[tiab] OR alert*[tiab] OR “early warning”[tiab] OR recommendation*[tiab] OR triage[tiab]) AND (“explainable AI”[tiab] OR XAI[tiab] OR “explainable machine learning”[tiab] OR “interpretable machine learning”[tiab] OR interpretability[tiab] OR interpretable[tiab] OR explainability[tiab] OR “model explanation*”[tiab] OR “model interpretability”[tiab] OR “post-hoc explanation*”[tiab] OR SHAP[tiab] OR Shapley[tiab] OR LIME[tiab] OR counterfactual*[tiab] OR “feature attribution”[tiab] OR “feature importance”[tiab] OR saliency[tiab] OR “saliency map*”[tiab] OR attention[tiab] OR “attention mechanism*”[tiab] OR “Grad-CAM”[tiab] OR “partial dependence”[tiab] OR “partial dependence plot”[tiab] OR PDP[tiab] OR “individual conditional expectation”[tiab] OR ICE[tiab]) | 16373 |
| PubMed | 4 | (“Artificial Intelligence”[MeSH] OR “Machine Learning”[MeSH] OR “Deep Learning”[MeSH] OR “Algorithms”[MeSH]) AND (“Clinical Decision Support Systems”[MeSH] OR “Decision Making, Computer-Assisted”[MeSH]) | 52254 |
| PubMed | 5 | (“clinical practice”[tiab] OR “clinical workflow”[tiab] OR workflow[tiab] OR “workflow integration”[tiab] OR implementation[tiab] OR deployment[tiab] OR “real-world”[tiab] OR bedside[tiab] OR “point of care”[tiab] OR dashboard*[tiab] OR alert*[tiab] OR “electronic health record*”[tiab] OR EHR[tiab] OR “electronic medical record*”[tiab] OR EMR[tiab] OR “human-in-the-loop”[tiab] OR usability[tiab] OR “user evaluation”[tiab] OR clinician*[tiab] OR physician*[tiab] OR nurse*[tiab]) AND (“intensive care”[tiab] OR ICU[tiab] OR “critical care”[tiab]) | 136412 |
| PubMed | 6 | (“Workflow”[MeSH] OR “Electronic Health Records”[MeSH] OR “Medical Records Systems, Computerized”[MeSH] OR “Point-of-Care Systems”[MeSH] OR “Diffusion of Innovation”[MeSH]) AND (“Intensive Care Units”[MeSH] OR “Critical Care”[MeSH]) | 3043 |
| PubMed | 7 | (#1 OR #2) AND (#3 OR #4) AND (#5 OR #6) | 527 |

| **Database** | **#** | **Search syntax** | **Citations found*** |
| --- | --- | --- | --- |
| **Scopus** | 1 | TITLE-ABS-KEY(“intensive care unit” OR ICU OR “critical care” OR “critically ill” OR “critical illness”) AND (adult OR adults OR “adult patient*” OR “18 years” OR “aged 18 years”) | 215965 |
|  | 2 | TITLE-ABS-KEY(“artificial intelligence” OR AI OR “machine learning” OR “deep learning” OR algorithm* OR “predictive model*”) AND (“clinical decision support” OR “decision support” OR CDSS OR “decision-making” OR “risk stratification” OR alert* OR “early warning” OR recommendation* OR triage) AND (“explainable AI” OR XAI OR “explainable machine learning” OR “interpretable machine learning” OR interpretability OR interpretable OR explainability OR “model explanation*” OR “model interpretability” OR “post-hoc explanation*” OR SHAP OR Shapley OR LIME OR counterfactual* OR “feature attribution” OR “feature importance” OR saliency OR “saliency map*” OR attention OR “attention mechanism*” OR “Grad-CAM” OR “partial dependence” OR “partial dependence plot” OR PDP OR “individual conditional expectation” OR ICE) | 45217 |
|  | 3 | TITLE-ABS-KEY(“clinical practice” OR “clinical workflow” OR workflow OR “workflow integration” OR implementation OR deployment OR “real-world” OR bedside OR “point of care” OR dashboard* OR alert* OR “electronic health record*” OR EHR OR “electronic medical record*” OR EMR OR “human-in-the-loop” OR usability OR “user evaluation” OR clinician* OR physician* OR nurse*) AND (“intensive care” OR ICU OR “critical care”) | 215965 |
|  | 4 | #1 AND #2 AND #3 | 157 |

| **Database** | **#** | **Search syntax** | **Citations found*** |
| --- | --- | --- | --- |
| **EbscoHost** | 1 | (“intensive care unit” OR ICU OR “critical care” OR “critically ill” OR “critical illness”) AND (adult OR adults OR “adult patient*” OR “18 years” OR “aged 18 years”) | 168608 |
|  | 2 | (“artificial intelligence” OR AI OR “machine learning” OR “deep learning” OR algorithm* OR “predictive model*”) AND (“clinical decision support” OR “decision support” OR CDSS OR “decision-making” OR “risk stratification” OR alert* OR “early warning” OR recommendation* OR triage) AND (“explainable AI” OR XAI OR “explainable machine learning” OR “interpretable machine learning” OR interpretability OR interpretable OR explainability OR “model explanation*” OR “model interpretability” OR “post-hoc explanation*” OR SHAP OR Shapley OR LIME OR counterfactual* OR “feature attribution” OR “feature importance” OR saliency OR “saliency map*” OR attention OR “attention mechanism*” OR “Grad-CAM” OR “partial dependence” OR “partial dependence plot” OR PDP OR “individual conditional expectation” OR ICE) | 9397 |
|  | 3 | (“clinical practice” OR “clinical workflow” OR workflow OR “workflow integration” OR implementation OR deployment OR “real-world” OR bedside OR “point of care” OR dashboard* OR alert* OR “electronic health record*” OR EHR OR “electronic medical record*” OR EMR OR “human-in-the-loop” OR usability OR “user evaluation” OR clinician* OR physician* OR nurse*) AND (“intensive care” OR ICU OR “critical care”) | 143703 |
|  | 4 | #1 AND #2 AND #3 | 72 |

| **Database** | **#** | **Search syntax** | **Citations found*** |
| --- | --- | --- | --- |
| **Web of Science** | 1 | (“intensive care unit” OR ICU OR “critical care” OR “critically ill” OR “critical illness”) AND (adult OR adults OR “adult patient*” OR “18 years” OR “aged 18 years”) | 63024 |
|  | 2 | (“artificial intelligence” OR AI OR “machine learning” OR “deep learning” OR algorithm* OR “predictive model*”) AND (“clinical decision support” OR “decision support” OR CDSS OR “decision-making” OR “risk stratification” OR alert* OR “early warning” OR recommendation* OR triage) AND (“explainable AI” OR XAI OR “explainable machine learning” OR “interpretable machine learning” OR interpretability OR interpretable OR explainability OR “model explanation*” OR “model interpretability” OR “post-hoc explanation*” OR SHAP OR Shapley OR LIME OR counterfactual* OR “feature attribution” OR “feature importance” OR saliency OR “saliency map*” OR attention OR “attention mechanism*” OR “Grad-CAM” OR “partial dependence” OR “partial dependence plot” OR PDP OR “individual conditional expectation” OR ICE) | 32823 |
|  | 3 | (“clinical practice” OR “clinical workflow” OR workflow OR “workflow integration” OR implementation OR deployment OR “real-world” OR bedside OR “point of care” OR dashboard* OR alert* OR “electronic health record*” OR EHR OR “electronic medical record*” OR EMR OR “human-in-the-loop” OR usability OR “user evaluation” OR clinician* OR physician* OR nurse*) AND (“intensive care” OR ICU OR “critical care”) | 96183 |
|  | 4 | #1 AND #2 AND #3 | 52 |

**Supplementary Table 2A.** Model Architecture, Interpretability Paradigm, and Explainability Methodology

| **No** | **Study (Author, Year)** | **AI/ML Architecture** | **Interpretability Paradigm** | **XAI Methodology & Visualizations** | **Clinical Domain** | **Clinical Task & Predicted Outcome** | **Clinical Task Cluster** | **Key Predictors** |
| --- | --- | --- | --- | --- | --- | --- | --- | --- |
| 1 | Zhu et al. (2025)45 | SepsisFormer (Transformer-based neural network) | Post-hoc | SHAP method. Visuals: Summary plots, decision plots, Sankey diagrams and chord plots. | P, T, I | The SMART Tool: Designed for prognostic prediction and 28-day mortality risk stratification in patients with sepsis. | Prognostic Risk & Mortality Forecasting | Age, 7 routine blood markers (aPTT, INR, WBC, Platelets, etc.) |
| 2 | X. Ge et al. (2025)30 | LightGBM (Gradient Boosting) | Post-hoc | SHAP values and PDP. Visuals: Summary, waterfall, and force plots. | P, T, I | Predicting moderate-to-severe SA-AKI at 48h (acute) & 7d (subacute) | Prognostic Risk & Mortality Forecasting | Urine output, SOFA, Ventilation, GCS, Creatinine, Nephrotoxins |
| 3 | M. Chen et al. (2026)44 | NeuralNetC Ensemble | Post-hoc | SHAP method. Visuals: Force plots and waterfall plots for individual patient risk. | P, T, I | Predicting all-cause, cardiovascular, & infection-related ICU mortality | Prognostic Risk & Mortality Forecasting | GCS, Sepsis, Troponin T, CPR, MCHC |
| 4 | Ma et al. (2025)26 | CatBoost (Optimal) | Post-hoc | SHAP method. Visuals: Value plots, importance bar charts, and dependency plots of clinical thresholds. | P, T, I | Predicting 30-day mortality after non-cardiac surgery | Prognostic Risk & Mortality Forecasting | Anion gap, Age, Prothrombin time (PT), Weight |
| 5 | Y. Ge et al. (2025)19 | XGBoost (Optimal) | Post-hoc | SHAP method. Visuals: Mean absolute SHAP value plots and summary plots for individual risks. | P, T, I | Predicting 30-day mortality for asthma patients | Prognostic Risk & Mortality Forecasting | Age, Respiratory Rate, RDW, Urine output, Anion gap |
| 6 | R. Yang et al. (2025)33 | Balanced Random Forest | Post-hoc | SHAP method; SHAP summary plots, beeswarm plots, and dependence plots were used. | P, T, I | Predicting in-hospital mortality for AMI patients | Prognostic Risk & Mortality Forecasting | APS III, eGFR, Anion gap, Glucose, Heart rate |
| 7 | Hu et al. (2023)35 | Soft voting ensemble learning model | Post-hoc | SHAP method: feature importance ranking graph, summary graph, and force graph. | P, T, I | Predicting in-hospital mortality for Ischemic Stroke patients | Prognostic Risk & Mortality Forecasting | GCS, Age, Intubation, WBC, Alkaline phosphatase |
| 8 | S. Q. Wang et al. (2025)76 | RF & Gradient Boosting | Post-hoc | SHapley Additive exPlanations (SHAP). Visuals: Beeswarm summary and force plots. | P, D, T, I | Predicting sepsis (RF) & in-hospital mortality (GBT) in burns | Prognostic Risk & Mortality Forecasting | SOFA, Shock, Albumin, BUN, Burn area |
| 9 | Gu & Lu (2025)38 | LR & XGBoost | Post-hoc | SHAP method and nomograms. Visuals: Variable importance plots, SHAP force plots and static/dynamic nomograms. | P, T, I | Early forecasting of in-hospital mortality for ICU cancer patients | Prognostic Risk & Mortality Forecasting | BUN, HR, Hemoglobin, SBP, Respiratory Rate |
| 10 | Z. J. Wang et al. (2025)37 | Stacking Ensemble | Post-hoc | SHAP (Shapley Additive Explanations). Visuals: Summary (beeswarm) and individual force plots. | P, T, I | Predicting 28-day mortality in liver cirrhosis | Prognostic Risk & Mortality Forecasting | INR, Bilirubin, Lactate, Urine Output, Ascites |
| 11 | Liu et al. (2025)20 | XGBoost | Post-hoc | SHapley Additive Explanations (SHAP). Visuals: Summary, bar, dependence, and waterfall plots. | P, T, I | Predicting malnutrition risk (Mod/Severe) within 24h | Prognostic Risk & Mortality Forecasting | BMI, Age, Energy Intake, Neutrophils, Magnesium |
| 12 | Cheng et al. (2026)27 | CatBoost | Post-hoc | SHAP method. Visuals: Beeswarm, dependency, waterfall, and force plots. | P, T, I | Predicting 30-day mortality in Stroke (GCS≤8) | Prognostic Risk & Mortality Forecasting | Anion gap, Age, RR, SBP, Na+, Ca2+, Glucose |
| 13 | Y. Wang et al. (2026)36 | Stacking Ensemble | Post-hoc | SHAP methodology. Visuals: Beeswarm plots, UMAP embeddings, trajectory plots, and individual force plots. | P, T, I | Predicting postoperative sepsis risk (Spinal injury) | Prognostic Risk & Mortality Forecasting | APACHE-II, SOFA, Surgery type, BUN, SBP |
| 14 | Bai et al. (2026)21 | XGBoost (Optimal) | Post-hoc | SHAP method. Visuals: Beeswarm summary, decision, waterfall, and dependency plots. | P, M, T, I | Dynamic prediction of in-hospital mortality (24h, 48h, 7d) and 90-day post-discharge mortality | Prognostic Risk & Mortality Forecasting | RDW, Age, Bilirubin, APTT, SOFA |
| 15 | C. Yang et al. (2026)28 | CatBoost (Optimal) | Post-hoc | SHAP method. Visuals: Importance bar plots, beeswarm plots, and force plots. | P, T, I | Predicting thrombotic event risk (Cancer ICU) | Prognostic Risk & Mortality Forecasting | Thrombosis history, Vent duration, Shock Index |
| 16 | Liang et al. (2026)22 | XGBoost | Post-hoc | SHAP method. Visuals: Global beeswarm plots and local patient-specific waterfall/bar charts. | P, T, I | Predicting severe chronic disease burden (aCCI ≥7) | Prognostic Risk & Mortality Forecasting | BUN, Gender, RDW, SpO2, Chloride |
| 17 | Wei et al. (2025)29 | CatBoost | Post-hoc | SHAP (Shapley Additive Explanations). Visuals: Summary, decision, force, and dependence plots. | P, T, I | Predicting in-hospital mortality (Acute Pancreatitis) | Prognostic Risk & Mortality Forecasting | Vent, BUN, Age, CRRT, Sepsis |
| 18 | Ding et al. (2024)23 | XGBoost | Post-hoc | SHAP algorithm. Visuals: Feature importance (beeswarm) plots, Venn diagrams and dependency plots. | P, T, I | Predicting mortality & neuro-status (TBI) | Prognostic Risk & Mortality Forecasting | Vent, Glucose, Temperature, Sodium, INR |
| 19 | Kim et al. (2023)31 | LightGBM | Post-hoc | SHAP algorithm. Visuals: Global feature impact plot. | P, T, I | Early prediction of Cardiac Arrest (1h prior) | Acute Onset & Deterioration Detection | RR, SBP, MBP, HR, SpO2 |
| 20 | Sjoding et al. (2021)10 | CNN (DenseNet-121) | Post-hoc | Gradient-weighted class activation mapping (Grad-CAM). Visuals: Heat maps overlaying radiographs to indicate areas of focus. | D, I | ARDS detection on chest radiographs | Acute Onset & Deterioration Detection | Image features (Regional opacities) |
| 21 | J. Chen et al. (2025)24 | XGBoost | Post-hoc | SHAP (Shapley Additive Explanations). Visuals: Bar plots, dependence plots, force plots and waterfall plots. | P, T, I | Predicting in-hospital mortality (Pneumonia) | Prognostic Risk & Mortality Forecasting | Age, BUN, Platelets, HR, RR |
| 22 | Liu et al., (2023)25 | XGBoost | Post-hoc | SHAP method. Visuals: Feature ranking and attribute beeswarm plots. | P, T, I | Early triage to find critically ill patients (ICU stay, dialysis, or death) within 24 hours | Operational Triage & Care Transition | LDH, AST, INR, Sodium, ALT |
| 23 | M. Yang et al. (2024)46 | Multiclass GBM | Post-hoc | SHAP method. Visuals: Beeswarm plots and individual force plots showing the risk factors. | P, T, I | Predicting disease paths: rapid death, recovery, or staying sick (persistent ill) to aid trial enrollment | Operational Triage & Care Transition | NEE, Urine, APS III, MBP, SpO2 |
| 24 | S. Wang et al. (2025)39 | TCF (TOPSIS-based Classification Fusion) integrating seven models | Post-hoc | SHapley Additive exPlanation (SHAP). Visuals: SHAP feature-importance heatmaps. | P, T, I | Predicting 28-day mortality (Septic Shock) | Prognostic Risk & Mortality Forecasting | Resuscitation count, Vent time, ICU stay, BP |
| 25 | (Rong et al. (2025)41 | TECO (Transformer-based Encounter-level Clinical Outcome) | Post-hoc | SHAP (Shapley Additive Explanations). Visuals: Clinically interpretable feature importance patterns. | P, M, T, I | Continuously predicts ICU mortality risk with hourly updates | Prognostic Risk & Mortality Forecasting | mSOFA, SF ratio, BMI, Temperature |
| 26 | Lin et al. (2025)32 | LightGBM | Post-hoc | SHAP method. Visuals: SHAP summary plots, heatmap visualisation, and feature importance rankings. | D, T, I | Early sepsis detection using routine blood count data | Acute Onset & Deterioration Detection | Lymphocyte %, Neutrophil %, NLR, Cell complexity |
| 27 | Magunia et al. (2021)43 | EBM (Explainable Boosting Machine) | Inherently interpretable (glass-box) | EBM approach: based on Generalised Additive Models (GAM) — the model is inherently interpretable by design; no post-hoc explainer is applied. Visuals: Non-linear shape functions (modular contribution plots), interaction heatmaps, and variable importance charts. | P, T, I | Predicts ICU survival, need for ECMO, and renal replacement therapy | Prognostic Risk & Mortality Forecasting | Age, P/N ratio, D-dimer, PaO2/FiO2 |
| 28 | Jia et al. (2021)42 | CNN | Post-hoc | DeepLIFT (feature importance graphs) and DiCE (counterfactual explanation tables) — both post-hoc. | M, T, I | Predicting extubation readiness (1h window) | Operational Triage & Care Transition | FiO2, Vent mode, Pressures, PEEP, Vol |
| 29 | McWilliams et al. (2019)34 | Random Forest & Logistic Regression | Post-hoc | Permutation Feature Importance (model-agnostic, post-hoc). Visuals: Ranked feature-importance tables based on the average performance loss. | M, T, I | Detects patients physiologically ready for discharge from the ICU | Operational Triage & Care Transition | GCS, Airway, BUN, FiO2, Heart rate |

**Clinical Domain codes:** P, Prognostic/Early Warning; D, Diagnostic/Detection; M, Monitoring/Dynamic Assessment; T, Treatment/Decision Support; I, Implementation/Readiness. Domains classified following Żerdziński et al. (2026).

**Abbreviations:** aCCI, age-adjusted Charlson comorbidity index; ALT, alanine aminotransferase; AMI, acute myocardial infarction; APACHE-II, acute physiology and chronic health evaluation II; APS III, acute physiology score III; aPTT/APTT, activated partial thromboplastin time; ARDS, acute respiratory distress syndrome; AST, aspartate aminotransferase; BMI, body mass index; BP, blood pressure; BUN, blood urea nitrogen; CNN, convolutional neural network; CPR, cardiopulmonary resuscitation; CRRT, continuous renal replacement therapy; DeepLIFT, deep learning important features; DiCE, diverse counterfactual explanations; EBM, explainable boosting machine; eGFR, estimated glomerular filtration rate; FiO2, fraction of inspired oxygen; GBM, gradient boosting machine; GCS, Glasgow coma scale; Grad-CAM, gradient-weighted class activation mapping; HR, heart rate; ICU, intensive care unit; INR, international normalized ratio; LDH, lactate dehydrogenase; LR, logistic regression; MBP, mean blood pressure; MCHC, mean corpuscular hemoglobin concentration; mSOFA, modified sequential organ failure assessment; NEE, norepinephrine-equivalent dose; NLR, neutrophil-to-lymphocyte ratio; PaO2/FiO2, ratio of arterial partial pressure of oxygen to fraction of inspired oxygen; PDP, partial dependence plot; PEEP, positive end-expiratory pressure; PT, prothrombin time; RDW, red cell distribution width; RF, random forest; RR, respiratory rate; SA-AKI, sepsis-associated acute kidney injury; SAPS II, simplified acute physiology score II; SBP, systolic blood pressure; SF ratio, SpO2/FiO2 ratio; SHAP, Shapley additive explanations; SOFA, sequential organ failure assessment; SpO2, peripheral oxygen saturation; TBI, traumatic brain injury; TCF, TOPSIS-based classification fusion; TECO, transformer-based encounter-level clinical outcome; TOPSIS, technique for order of preference by similarity to ideal solution; UMAP, uniform manifold approximation and projection; WBC, white blood cell (count); XGBoost, extreme gradient boosting.

**Supplementary Table 2B.** ModelPerformance, Clinical Utility, and Translational Maturity

| **No** | **Study (Author, Year)** | **Model Performance** | **Proposed Clinical Utility** | **Translational Output Category** | **Technology Readiness Level** | **Notes** |
| --- | --- | --- | --- | --- | --- | --- |
| 1 | Zhu et al. (2025) 45 | AUC: 0.9301 (Int), 0.7360 (Ext) | Identifies high-risk patients who gain significant survival benefits from heparin (anticoagulant) treatment. | Interactive Web Platform / Online Calculator | **TRL 5** | Public real-time bedside web platform |
| *validated offline on multicenter external and prospective cohorts* |
| 2 | X. Ge et al. (2025) 30 | AUC (Ext): 0.770–0.793 (48h), 0.720–0.773 (7d) | It prevents overtreatment of mild cases and guides early precision intervention for high-risk patients. | Interactive Web Platform / Online Calculator | **TRL 5** | Public Streamlit web app |
| *multicenter international validation performed offline across three independent databases* |
| 3 | M. Chen et al. (2026) 44 | External AUC: 0.847 (All-cause mortality) | This helps clinicians initiate timely treatments, such as fluid management or targeted antibiotics. | Interactive Web Platform / Online Calculator | **TRL 5** | Public real-time bedside web platform |
| *validated offline using international multicenter external datasets* |
| 4 | Ma et al. (2025)26 | AUC: 0.96 (Test), 0.98 (External) | It helps clinicians identify high-risk elderly patients early to optimise treatment plans and resource use. | Interactive Web Platform / Online Calculator | **TRL 5** | Online calculator for clinical use |
| *validated offline using temporal separation via MIMIC-III database* |
| 5 | Y. Ge et al., (2025)19 | AUROC: 0.83 (Int), 0.80 (Ext) | It supports real-time risk stratification and guides decisions regarding intubation and medication escalation. | Interactive Web Platform / Online Calculator | **TRL 5** | Interactive bedside web tool |
| *validated offline using temporal separation within the MIMIC database* |
| 6 | R. Yang et al. (2025)33 | AUC: 0.891 (Int), 0.784 (Ext) | It assists clinicians in risk stratification and identifying patients with a high mortality risk for prioritised interventions and efficient resource allocation. | Interactive Web Platform / Online Calculator | **TRL 5** | Web-based risk assessment tool; hosted via public repository |
| *External + international validation; public web tool for manual risk assessment.* |
| 7 | Hu et al. (2023) 35 | AUROC: 0.861 (Int), 0.844 (Ext) | It provides early risk stratification (low, medium, and high risk) to identify high-risk groups and guide medical resource allocation. | Interactive Web Platform / Online Calculator | **TRL 5** | Public online risk prediction tool |
| *validated offline using independent external database validation* |
| 8 | S. Q. Wang et al. (2025) 76 | AUC: 0.977 (Sepsis), 0.981 (Mortality) | It facilitates the early identification of sepsis and mortality risks to guide intensive care strategies and early interventions. | Interactive Web Platform / Online Calculator | **TRL 4** | Two public web-based calculators |
| *validated only via internal split-sample retrospective single-center dataset* |
| 9 | Gu & Lu (2025) 38 | AUC (Ext): 0.751 (LR), 0.737 (XGB) | It assists physicians in identifying high-risk patients for timely intervention and personalised treatment plans. | Interactive Web Platform / Online Calculator | **TRL 5** | Dynamic online calculator with static nomograms |
| *validated offline using independent external database validation* |
| 10 | Z. J. Wang et al. (2025) 37 | AUC: 0.845 (Int), 0.819 (eICU), 0.761 (Local) | It helps doctors identify which patients benefit from aggressive treatment, ICU stay, or urgent liver transplantation. | Interactive Web Platform / Online Calculator | **TRL 5** | Bedside decision-making calculator |
| *validated offline using international multicenter external datasets* |
| 11 | Liu et al. (2025) 20 | AUC: 0.98 (Int), 0.88 (Ext) | This enables clinicians to initiate early nutritional interventions and personalised treatment plans to improve outcomes. | Interactive Web Platform / Online Calculator | **TRL 5** | Interactive online tool; frontend code also on GitHub |
| *validated offline using specialized ICU cohorts with temporal separation* |
| 12 | Cheng et al. (2026) 27 | AUC: 0.873 (Int), 0.848 (Ext) | This supports the early identification of high-risk individuals for timely and personalised interventions. | Interactive Web Platform / Online Calculator | **TRL 5** | Public web-based prediction tool |
| *validated offline using geographically distinct multicenter ICU data* |
| 13 | Y. Wang et al. (2026) 36 | AUC: 0.918 (Int), 0.848 (Ext) | It enables early risk stratification to guide timely preventive measures and optimise resource allocation. | Interactive Web Platform / Online Calculator | **TRL 5** | Point-of-care bedside calculator |
| *validated offline using multicenter external and international independent datasets* |
| 14 | Bai et al. (2026) 21 | AUC (24h): 0.961 (Train), 0.871 (Ext) | It guides the rational allocation of ICU bed resources and identifies high-risk patients who require intensified monitoring or early reassessment. | Interactive Web Platform / Online Calculator | **TRL 5** | Interactive prognostic web platform |
| *validated offline on independent/external multicenter hospital datasets* |
| 15 | C. Yang et al. (2026) 28 | AUC: 0.855 (Int), 0.830 (Ext) | Guides personalized thromboprophylaxis (anticoagulation therapy) to balance treatment efficacy and bleeding safety. | Interactive Web Platform / Online Calculator | **TRL 5** | Real-time individualized risk calculator |
| *validated offline using independent geographically distinct external hospital dataset* |
| 16 | Liang et al. (2026)22 | AUROC: 0.84 (Int), 0.88 (Ext) | It helps clinicians identify high-risk individuals early to personalise treatment and allocate resources efficiently. | Interactive Web Platform / Online Calculator | **TRL 5** | Bedside Shiny calculator |
| *validated offline across multicenter independent external hospital datasets* |
| 17 | Wei et al. (2025) 29 | AUC: 0.835 (Test), 0.782 (Ext) | Facilitates early risk stratification to prioritize fluid resuscitation and aggressive treatment in high-risk patients. | Interactive Web Platform / Online Calculator | **TRL 5** | Public intuitive web calculator |
| *validated offline using independent external hospital dataset* |
| 18 | Ding et al. (2024)23 | AUROC: 0.878 (Mortality), 0.877 (Neuro status) | It supports treatment decision-making and timely clinical interventions based on routine clinical data collection. | Interactive Web Platform / Online Calculator | **TRL 5** | Online clinical prediction tool |
| *validated offline using multicenter independent external hospital datasets* |
| 19 | Kim et al. (2023) 31 | AUROC: 0.86 (Int), 0.74 (Ext) | It reduces false alarms while allowing 1–6 h for clinical intervention to improve survival rates. | Clinically Mature Application | **TRL 9** | Feasible for routine clinical use |
| *fully adopted and reported as clinically mature application* |
| 20 | Sjoding et al. (2021) 10 | AUROC: 0.92 (Int), 0.88 (Ext) | Supports real-time identification of ARDS to ensure that patients receive evidence-based care, such as prone positioning. | Interactive Web Platform / Online Calculator | **TRL 5** | Demonstration web platform |
| *validated offline on independent external hospital system dataset* |
| 21 | J. Chen et al. (2025) 24 | AUC: 0.747 (Train), 0.65–0.69 (Ext) | Guidelines for early risk stratification optimise resource allocation and timely therapeutic interventions. | Interactive Web Platform / Online Calculator | **TRL 5** | Web calculator developed for bedside accessibility |
| *validated offline on international multicenter and prospective cohorts* |
| 22 | Liu et al. (2023) 25 | AUC: 0.90 (Test); Sensitivity: 0.93 | It helps doctors select the appropriate treatment, decide on hospital referrals, and reduce medical waste. | Open-Source Repository / Public Code | **TRL 5** | Downloadable software on GitHub |
| *validated offline using independent multicenter hospital cohorts* |
| 23 | M. Yang et al. (2024) 46 | AUC: 0.807 (PI), 0.696 (Ext) | It reduces patient differences in trials and identifies patients who will remain ill long enough to benefit from therapy. | Hospital System Integration | **TRL 7** | Internally deployed bedside app connected to hospital EHR |
| *internally deployed and connected to the hospital EHR system* |
| 24 | S. Wang et al. (2025) 39 | AUC: 0.733 (Int), 0.808 (Pediatric) | It provides a reliable early warning tool to facilitate early monitoring and aggressive treatment. | Open-Source Repository / Public Code | **TRL 5** | Real-time bedside prediction tool; code available |
| *validated offline using multicenter external and cross-specialty datasets* |
| 25 | Rong et al. (2025)41 | AUC: 0.89–0.97 (Int), 0.65–0.77 (Ext) | It alerts clinicians to patient deterioration 48 h earlier than standard commercial tools (EDI). | Hospital System Integration | **TRL 7** | Potential real-time early warning/monitoring tool |
| *benchmarked against proprietary EHR tool for clinical monitoring feasibility* |
| 26 | Lin et al. (2025)32 | AUC: 0.90 (Testing) | It facilitates rapid sepsis confirmation and intervention (e.g. antibiotics) within the crucial first hour. | Hospital System Integration | **TRL 7** | Integrated AI-CDSS web interface |
| *integrated into clinical workflows via a web-based AI-CDSS interface* |
| 27 | Magunia et al. (2021)43 | PR-AUC: 0.81 (Survival), 0.73 (ECMO) | Helps clinicians identify specific clinical cut-off values (e.g. age >61 years) to weigh the criteria for individual outcomes. | Hospital System Integration | **TRL 7** | REDCap-based registry implementation |
| *pilot deployment via national electronic registry across 27 hospitals* |
| 28 | Jia et al. (2021) 42 | Accuracy: 86%; AUC-ROC: 0.94 | It prompts clinicians to start Spontaneous Breathing Trials (SBT) and shows what feature changes lead to readiness. | Open-Source Repository / Public Code | **TRL 4** | Source code available for bedside decision support |
| *assessed solely through internal split-sample retrospective validation* |
| 29 | McWilliams et al. (2019) 34 | AUROC: 0.894 (MIMIC), 0.888 (GICU) | Dashboard notification or "nudge" to prompt clinicians to consider discharging patients, streamlining ward rounds. | Hospital System Integration | **TRL 7** | Intended for future dashboard integration |
| *categorized as hospital system integration for workflow use* |

**Abbreviations:** AI-CDSS, artificial intelligence-based clinical decision support system; ARDS, acute respiratory distress syndrome; AUC, area under the curve; AUROC/AUC-ROC, area under the receiver operating characteristic curve; ECMO, extracorporeal membrane oxygenation; EDI, Epic Deterioration Index; EHR, electronic health record; eICU, eICU Collaborative Research Database; Ext, external (validation cohort); GICU, general intensive care unit; Int, internal (validation cohort); LR, logistic regression; MIMIC, Medical Information Mart for Intensive Care; PI, persistently ill; PR-AUC, precision-recall area under the curve; REDCap, Research Electronic Data Capture; SBT, spontaneous breathing trial; TRL, technology readiness level; XGB, XGBoost (eXtreme Gradient Boosting).
